# Supplementary material
Source: PubMed Central journal article supplement (PMC6517655)
Supplement: ba026047-suppl1.pdf [file ba026047-suppl1.pdf]

Tables

| <b>Table S1. Baseline demographics and DXA results of the Hb SS/Hb S<math>\beta^0</math>-thalassemia subgroup in SCCRIP BMD cohort</b>                                                                         |               |                |               |               |                |                |
|----------------------------------------------------------------------------------------------------------------------------------------------------------------------------------------------------------------|---------------|----------------|---------------|---------------|----------------|----------------|
|                                                                                                                                                                                                                | All (n=196)   |                | Female (n=93) |               | Male (n=103)   |                |
|                                                                                                                                                                                                                | School age    | Adolescent     | School age    | Adolescent    | School age     | Adolescent     |
|                                                                                                                                                                                                                | n (%)         | n (%)          | n (%)         | n (%)         | n (%)          | n (%)          |
| Variables                                                                                                                                                                                                      | 60 (30.6)     | 136 (69.4)     | 26 (28.0)     | 67 (72.0)     | 34(33.0)       | 69 (67.0)      |
| Age at DXA (years)                                                                                                                                                                                             |               |                |               |               |                |                |
| Mean (SD)                                                                                                                                                                                                      | 7.2 (1.20)*   | 14.7 (2.17)*   | 7.1 (0.92)*   | 14.7 (2.17)*  | 7.3 (1.38)*    | 14.7 (2.19)*   |
| Hydroxyurea use                                                                                                                                                                                                |               |                |               |               |                |                |
| No                                                                                                                                                                                                             | 12 (20.0)     | 24 (17.7)      | 5 (19.2)      | 10 (14.9)     | 7 (20.6)       | 14 (20.3)      |
| Yes                                                                                                                                                                                                            | 48 (80.0)     | 112 (82.3)     | 21 (80.8)     | 57 (85.1)     | 27 (79.4)      | 55 (79.7)      |
| Chronic RBC transfusions                                                                                                                                                                                       |               |                |               |               |                |                |
| No                                                                                                                                                                                                             | 59 (98.3)     | 130 (95.6)     | 26 (100)      | 63 (94.0)     | 33 (97.1)      | 67 (97.1)      |
| Yes                                                                                                                                                                                                            | 1 (1.7)       | 6 (4.4)        | 0 (0)         | 4 (6.0)       | 1 (2.9)        | 2 (2.9)        |
| Height (cm)                                                                                                                                                                                                    |               |                |               |               |                |                |
| Mean (SD)                                                                                                                                                                                                      | 121.5 (9.38)* | 159.4 (12.29)* | 119.7 (4.18)* | 157.8 (9.11)* | 122.8 (10.48)* | 161.1 (14.63)* |
| Height-for-age Z-scores                                                                                                                                                                                        |               |                |               |               |                |                |
| Mean (SD)                                                                                                                                                                                                      | -0.23 (0.92)  | -0.28 (1.1)    | -0.37 (0.75)  | -0.15 (1.09)  | -0.12 (1.03)   | -0.41 (1.11)   |
| TBLH BMD (g/cm <sup>2</sup> )                                                                                                                                                                                  |               |                |               |               |                |                |
| Mean (SD)                                                                                                                                                                                                      | 0.57 (0.07)*  | 0.83 (0.11)*   | 0.56 (0.06)*  | 0.83 (0.08)*  | 0.58 (0.08)*   | 0.83 (0.13)*   |
| TBLH aBMD Z-score                                                                                                                                                                                              |               |                |               |               |                |                |
| Normal                                                                                                                                                                                                         | 44 (73.3)     | 77 (56.6)      | 19 (73.1)     | 42 (62.3)     | 25 (73.5)      | 35 (50.7)      |
| Low                                                                                                                                                                                                            | 16 (26.7)     | 59 (43.4)      | 7 (26.9)      | 25 (37.3)     | 9 (26.5)       | 34 (49.3)      |
| TBLH aBMD Z-score                                                                                                                                                                                              |               |                |               |               |                |                |
| Mean (SD)                                                                                                                                                                                                      | -1.4 (0.86)*  | -1.9 (1.19)*   | -1.3 (0.89)*  | -1.8 (1.11)*  | -1.47 (0.85)*  | -2.0 (1.25)*   |
| TBLH Ht-aBMD Z-score                                                                                                                                                                                           |               |                |               |               |                |                |
| Normal                                                                                                                                                                                                         | 56 (93.3)*    | 95 (69.9)*     | 24 (92.3)     | 50 (74.6)     | 32 (94.1)*     | 45 (65.2)*     |
| Low                                                                                                                                                                                                            | 4 (6.7)*      | 43 (30.2)*     | 2 (7.7)       | 18 (25.4)     | 2 (5.9)*       | 24 (34.8)*     |
| TBLH Ht-aBMD Z-score                                                                                                                                                                                           |               |                |               |               |                |                |
| Mean (SD)                                                                                                                                                                                                      | -0.97 (0.61)* | -1.62 (0.98)*  | -0.90 (0.65)* | -1.57 (0.94)* | -1.02 (0.58)*  | -1.66 (1.02)*  |
| DXA Dual-energy X-ray absorptiometry; SCCRIP Sickle Cell Clinical Research and Intervention Program; BMD Bone mineral density; RBC Red blood cell; Chronic RBC transfusions $\geq$ 4 RBC transfusions per year |               |                |               |               |                |                |
| TBLH Total body less head; aBMD Areal bone mineral density; Ht-aBMD Height-adjusted areal bone mineral density *p<0.05 school age versus adolescent values                                                     |               |                |               |               |                |                |

| <b>Table S2. Clinical characteristics of the Hb SS/Hb S<math>\beta</math><sup>0</sup>-thalassemia subgroup in SCCRIP BMD Cohort</b> |                         |                      |                         |                      |                         |                      |
|-------------------------------------------------------------------------------------------------------------------------------------|-------------------------|----------------------|-------------------------|----------------------|-------------------------|----------------------|
|                                                                                                                                     | <b>All (n=196)</b>      |                      | <b>Female (n=93)</b>    |                      | <b>Male (n=103)</b>     |                      |
|                                                                                                                                     | <b>Normal BMD, n(%)</b> | <b>Low BMD, n(%)</b> | <b>Normal BMD, n(%)</b> | <b>Low BMD, n(%)</b> | <b>Normal BMD, n(%)</b> | <b>Low BMD, n(%)</b> |
| <b>Variables</b>                                                                                                                    | <b>151(77.0)</b>        | <b>45(23.0)</b>      | <b>74 (79.6)</b>        | <b>19 (20.4)</b>     | <b>77 (74.8)</b>        | <b>26 (25.2)</b>     |
| <b>Age at DXA (years)</b>                                                                                                           |                         |                      |                         |                      |                         |                      |
| Mean (SD)                                                                                                                           | 11.8 (4.06)*            | 14.4 (2.91)*         | 12.1 (4.06)             | 14.2 (2.98)          | 11.5 (4.05)*            | 14.5(2.90)*          |
| <b>Age category</b>                                                                                                                 |                         |                      |                         |                      |                         |                      |
| School age                                                                                                                          | 55 (37.1)*              | 4 (8.9)*             | 24 (32.4)               | 2 (10.5)             | 32 (41.6)*              | 2 (7.7)*             |
| Adolescent                                                                                                                          | 95 (62.9)*              | 41 (91.1)*           | 50 (67.6)               | 17 (89.5)            | 45 (58.4)*              | 24 (92.3)*           |
| <b>VOE per year (total)</b>                                                                                                         |                         |                      |                         |                      |                         |                      |
| Mean (SD)                                                                                                                           | 0.36 (0.50)*            | 0.26 (0.52)*         | 0.32 (0.43)             | 0.35 (0.66)          | 0.40 (0.55)             | 0.20 (0.39)          |
| <b>VOE per year (2 years to DXA)</b>                                                                                                |                         |                      |                         |                      |                         |                      |
| Mean (SD)                                                                                                                           | 0.89 (2.64)             | 0.89 (2.28)          | 0.77 (1.88)             | 0.74 (1.37)          | 1.01 (3.22)             | 1.00 (2.79)          |
| <b>VOE total (categorical)</b>                                                                                                      |                         |                      |                         |                      |                         |                      |
| < 5 times                                                                                                                           | 60 (39.7)*              | 26 (57.8)*           | 25 (33.8)*              | 12 (63.2)*           | 35 (45.5)               | 14 (53.9)            |
| 5-10 times                                                                                                                          | 50 (33.1)*              | 10 (22.2)*           | 33 (45.6)*              | 2 (10.5)*            | 17 (22.1)               | 8 (30.8)             |
| > 10 times                                                                                                                          | 41 (27.2)*              | 9 (2.0)*             | 16 (21.6)*              | 5 (26.3)*            | 25 (32.5)               | 4 (15.4)             |
| <b>Hydroxyurea use</b>                                                                                                              |                         |                      |                         |                      |                         |                      |
| No                                                                                                                                  | 29 (19.2)               | 7 (15.6)             | 12 (16.2)               | 3 (15.8)             | 17 (22.1)               | 4 (15.4)             |
| Yes                                                                                                                                 | 121 (80.8)              | 38 (84.4)            | 62 (83.8)               | 16 (84.2)            | 60 (77.9)               | 22 (84.6)            |
| <b>Hydroxyurea duration</b>                                                                                                         |                         |                      |                         |                      |                         |                      |
| < 5 years                                                                                                                           | 92 (60.9)               | 23 (51.1)            | 45 (60.8)               | 10 (52.6)            | 47 (61.0)               | 13 (50.0)            |
| 5-10 years                                                                                                                          | 22 (14.6)               | 7 (15.6)             | 9 (12.2)                | 2 (10.5)             | 13 (16.9)               | 5 (19.2)             |
| > 10 years                                                                                                                          | 37 (24.5)               | 15 (33.3)            | 20 (27.0)               | 7 (36.8)             | 17 (22.1)               | 8 (30.8)             |
| <b>Hydroxyurea duration (years)</b>                                                                                                 |                         |                      |                         |                      |                         |                      |
| Mean (SD)                                                                                                                           | 4.48 (4.21)             | 4.98 (4.33)          | 4.47 (4.17)             | 4.71 (3.83)          | 4.50 (4.27)             | 5.17 (4.73)          |
| <b>Chronic RBC transfusions</b>                                                                                                     |                         |                      |                         |                      |                         |                      |
| No                                                                                                                                  | 146 (96.7)              | 43 (95.6)            | 71 (96.0)               | 18 (94.7)            | 75 (97.4)               | 25 (96.2)            |
| Yes                                                                                                                                 | 5 (3.3)                 | 2 (4.4)              | 3 (4.0)                 | 1 (5.3)              | 2 (2.6)                 | 1 (3.8)              |
| <b>Chronic pain</b>                                                                                                                 |                         |                      |                         |                      |                         |                      |

|                                                                                                                                                                                                                                      |             |            |            |            |           |           |
|--------------------------------------------------------------------------------------------------------------------------------------------------------------------------------------------------------------------------------------|-------------|------------|------------|------------|-----------|-----------|
| No                                                                                                                                                                                                                                   | 147 (97.3)  | 41 (91.1)  | 73 (98.7)  | 19 (100.0) | 74 (96.1) | 22 (84.6) |
| Yes                                                                                                                                                                                                                                  | 4 (2.7)     | 4 (8.9)    | 1 (1.3)    | 0 (0)      | 3 (3.9)   | 4 (15.4)  |
| <b>Hip osteonecrosis</b>                                                                                                                                                                                                             |             |            |            |            |           |           |
| No                                                                                                                                                                                                                                   | 146 (96.7)* | 40 (88.9)* | 74 (100.0) | 19 (100)   | 72 (93.5) | 21 (80.8) |
| Yes                                                                                                                                                                                                                                  | 5 (3.3)*    | 5 (11.1)*  | 0 (0)      | 0 (0)      | 5 (6.5)   | 5 (19.2)  |
| <b>Vitamin D status</b>                                                                                                                                                                                                              |             |            |            |            |           |           |
| Normal                                                                                                                                                                                                                               | 45 (31.3)   | 9 (22.5)   | 21(30.0)   | 2 (10.5)   | 24 (32.4) | 7 (33.3)  |
| Insufficient                                                                                                                                                                                                                         | 50 (34.7)   | 17 (42.5)  | 28 (40.0)  | 7 (36.8)   | 22 (29.7) | 10 (47.6) |
| Deficient                                                                                                                                                                                                                            | 49 (34.0)   | 14 (35.0)  | 21 (30.0)  | 10 (52.6)  | 28 (37.8) | 4 (19.1)  |
| BMD Bone mineral density; SCD Sickle cell disease; VOE Vasocclusive episode; RBC Red blood cell; Chronic RBC transfusions $\geq$ 4 times/year; Vitamin D status (normal > 30 ng/ml, insufficient 20-30 ng/ml, deficient < 20 ng/ml); |             |            |            |            |           |           |
| * $p < 0.05$ in normal vs. low BMD per variable                                                                                                                                                                                      |             |            |            |            |           |           |

**Table S3. Laboratory parameters of the Hb SS/Hb S $\beta^0$ -thalassemia subgroup in SCCRIP BMD cohort**

|                                         | All (n=196)        |                | Female (n=93)     |                | Male (n=103)      |                |
|-----------------------------------------|--------------------|----------------|-------------------|----------------|-------------------|----------------|
|                                         | Normal BMD (n=151) | Low BMD (n=45) | Normal BMD (n=74) | Low BMD (n=19) | Normal BMD (n=77) | Low BMD (n=26) |
| Variables                               | Mean (SD)          | Mean (SD)      | Mean (SD)         | Mean (SD)      | Mean (SD)         | Mean (SD)      |
| WBC (x10 <sup>3</sup> mm <sup>3</sup> ) | 10.1 (4.26)        | 9.9 (3.52)     | 9.5 (4.12)        | 9.9 (4.42)     | 10.6 (4.35)       | 9.9 (2.74)     |
| Hemoglobin (g/dL)                       | 9.3 (1.31)         | 9.1 (1.03)     | 9.2 (1.16)        | 9.0 (0.94)     | 9.4 (1.43)        | 9.1 (1.12)     |
| Platelets (mm <sup>3</sup> )            | 389 (183.7)        | 419 (184.8)    | 361(174.9)        | 435(203.5)     | 416 (189.1)       | 407 (172.6)    |
| LDH (units/L)                           | 489 (178.4)        | 451 (152.4)    | 448 (149.8)       | 415 (136.1)    | 528 (195.1)       | 478 (160.7)    |
| Total bilirubin (mg/dL)                 | 2.3 (1.38)*        | 2.8 (1.66)*    | 2.2 (1.12)        | 2.8 (1.82)     | 2.4 (1.59)        | 2.8 (1.58)     |
| Indirect bilirubin (mg/dL)              | 2.3 (1.30)*        | 2.8 (1.51)*    | 2.2 (0.98)*       | 3.0 (1.59)*    | 2.4 (1.53)        | 2.7(1.48)      |
| Fetal hemoglobin (%)                    | 18.4 (9.8)*        | 14.7 (7.32)*   | 18.5 (9.93)*      | 13.7 (6.79)*   | 18.3 (9.74)       | 15.4 (7.80)    |
| Albumin (g/dL)                          | 4.5 (0.28)         | 4.4 (0.29)     | 4.5 (0.29)        | 4.4 (0.27)     | 4.5 (0.26)        | 4.4 (0.31)     |
| ALP (units/L)                           | 153.3 (58.38)      | 139.0 (59.41)  | 137.7 (56.11)     | 121.5 (63.12)  | 168.0 (57.02)     | 152.6 (53.8)   |
| AST/SGOT (units/L)                      | 39.3 (16.39)       | 37.3(12.25)    | 36.4 (16.45)      | 34.0 (11.09)   | 42.1 (15.94)      | 40.0 (12.72)   |
| Calcium (mg/dL)                         | 9.5 (0.38)*        | 9.3 (0.31)*    | 9.4 (0.39)        | 9.4 (0.31)     | 9.5 (0.37)*       | 9.3 (0.30)*    |
| Creatinine (mg/dL)                      | 0.44 (0.13)        | 0.46 (0.11)    | 0.43 (0.12)       | 0.46 (0.10)    | 0.45 (0.14)       | 0.47 (0.12)    |
| BUN (mg/dL)                             | 7.4 (2.74)         | 6.9 (1.96)     | 7.1 (2.26)        | 6.5 (2.20)     | 7.7 (3.11)        | 7.1 (1.77)     |

|                                                                                                                                                                                                                                                 |             |            |               |              |              |             |
|-------------------------------------------------------------------------------------------------------------------------------------------------------------------------------------------------------------------------------------------------|-------------|------------|---------------|--------------|--------------|-------------|
| <b>Vitamin D (ng/ml)</b>                                                                                                                                                                                                                        | 25.6 (12.5) | 22.9 (9.0) | 26.0 (12.55)* | 19.1 (8.87)* | 25.2 (12.54) | 26.4 (7.77) |
|                                                                                                                                                                                                                                                 |             |            |               |              |              |             |
| SCCRIP Sickle Cell Clinical Research and Intervention Program; BMD Bone mineral density; WBC White blood cell; ALP Alkaline phosphatase; AST Aspartate aminotransferase; SGOT Serum glutamic-oxaloacetic transaminase; BUN Blood urea nitrogen; |             |            |               |              |              |             |
| * $p < 0.05$ in normal versus low BMD per variable                                                                                                                                                                                              |             |            |               |              |              |             |

| <b>Table S4: Univariate logistic regression of clinical and laboratory correlates in SCCRIP cohort</b> |                             |                        |                                                        |                        |
|--------------------------------------------------------------------------------------------------------|-----------------------------|------------------------|--------------------------------------------------------|------------------------|
|                                                                                                        | <b>Total cohort (n=308)</b> |                        | <b>Hb SS/Sβ<sup>0</sup>-thalassemia subset (n=196)</b> |                        |
| <b>Variables</b>                                                                                       | <b>Odds ratio (95% CI)</b>  | <b>p-value</b>         | <b>Odds ratio (95% CI)</b>                             | <b>p-value</b>         |
| <b>SCD genotype</b>                                                                                    |                             | 0.000385               |                                                        |                        |
| Hb SC                                                                                                  | 0.18(0.0617-0.5126)         | 0.0014                 |                                                        |                        |
| Hb Sβ+ thalassemia                                                                                     | 1.07(0.4312-2.6788)         | 0.88                   |                                                        |                        |
| Hb SS/Sβ0 thalassemia (ref)                                                                            |                             |                        |                                                        |                        |
| <b>Gender</b>                                                                                          |                             | 0.38                   |                                                        | 0.40                   |
| Male                                                                                                   | 1.30 (0.73-2.33)            |                        | 1.33 (0.68-2.61)                                       |                        |
| Female (ref)                                                                                           |                             |                        |                                                        |                        |
| <b>Age (years)</b>                                                                                     | 1.20 (1.10-1.31)            | 4.4 x 10 <sup>-5</sup> | 1.21 (1.09-1.34)                                       | 2.2 x 10 <sup>-4</sup> |
| <b>Age category</b>                                                                                    |                             | 1.6 x 10 <sup>-4</sup> |                                                        | 0.00096                |
| Adolescent                                                                                             | 7.57 (2.65-21.61)           |                        | 6.15 (2.09-18.07)                                      |                        |
| School age (ref)                                                                                       |                             |                        |                                                        |                        |
| <b>Hydroxyurea use</b>                                                                                 |                             | 0.041                  |                                                        | 0.53                   |
| Yes                                                                                                    | 1.93 (1.03-3.63)            |                        | 1.33 (0.54-3.28)                                       |                        |
| No (ref)                                                                                               |                             |                        |                                                        |                        |
| <b>Hydroxyurea duration</b>                                                                            |                             | 0.11                   |                                                        | 0.44                   |
| 5-10 years                                                                                             | 2.01 (1.00-4.03)            | 0.049                  | 1.64 (0.77-3.48)                                       | 0.2                    |
| >= 10 years                                                                                            | 1.75 (0.69-4.42)            | 0.24                   | 1.29 (0.49-3.38)                                       | 0.61                   |
| <5 years (ref)                                                                                         |                             |                        |                                                        |                        |
| <b>Hydroxyurea duration (years)</b>                                                                    | 1.07 (1.00-1.14)            | 0.058                  | 1.03 (0.95-1.11)                                       | 0.47                   |
| <b>Chronic pain</b>                                                                                    |                             | 0.027                  |                                                        | 0.078                  |
| Yes                                                                                                    | 3.99 (1.17-13.57)           |                        | 3.61 (0.87-15.06)                                      |                        |
| No (ref)                                                                                               |                             |                        |                                                        |                        |
| <b>Hip osteonecrosis</b>                                                                               |                             | 0.0068                 |                                                        | 0.048                  |
| Yes                                                                                                    | 4.32 (1.50-12.47)           |                        | 3.68 (1.01-13.32)                                      |                        |
| No (ref)                                                                                               |                             |                        |                                                        |                        |
| <b>Chronic RBC transfusions</b>                                                                        |                             | 0.054                  |                                                        | 0.71                   |
| Yes                                                                                                    | 3.77 (0.98-14.52)           |                        | 1.37 (0.26-7.30)                                       |                        |
| No                                                                                                     |                             |                        |                                                        |                        |
| <b>Hemoglobin (mg/dL)</b>                                                                              | 0.76 (0.63-0.93)            | 0.0065                 | 0.85 (0.64-1.12)                                       | 0.24                   |
| <b>Total bilirubin (mg/dL)</b>                                                                         | 1.37 (1.13-1.67)            | 0.0015                 | 1.24 (1.00-1.54)                                       | 0.049                  |
| <b>Indirect bilirubin (mg/dL)</b>                                                                      | 1.34 (1.06-1.69)            | 0.014                  | 1.29 (1.01-1.65)                                       | 0.042                  |

| <b>Table S4: Univariate logistic regression of clinical and laboratory correlates in SCCRIP cohort</b>                                                                        |                             |        |                                                               |        |
|-------------------------------------------------------------------------------------------------------------------------------------------------------------------------------|-----------------------------|--------|---------------------------------------------------------------|--------|
|                                                                                                                                                                               | <b>Total cohort (n=308)</b> |        | <b>Hb SS/S<math>\beta^0</math>-thalassemia subset (n=196)</b> |        |
| <b>Fetal hemoglobin (%)</b>                                                                                                                                                   | 0.98 (0.94-1.01)            | 0.18   | 0.95 (0.91-1.00)                                              | 0.032  |
| <b>Calcium (mg/dL)</b>                                                                                                                                                        | 0.37 (0.15-0.88)            | 0.025  | 0.32 (0.12-0.86)                                              | 0.024  |
| <b>Vitamin D status</b>                                                                                                                                                       |                             | 0.2392 |                                                               | 0.5042 |
| Deficient                                                                                                                                                                     | 1.86 (0.79-4.40)            | 0.15   | 1.4 (0.55-3.55)                                               | 0.48   |
| Insufficient                                                                                                                                                                  | 1.91 (0.83-4.39)            | 0.13   | 1.7 (0.69-4.193)                                              | 0.25   |
| Normal (ref)                                                                                                                                                                  |                             |        |                                                               |        |
| BMD Bone mineral density; SCCRIP Sickle Cell Clinical Research and Intervention Program; SCD Sickle Cell Disease; RBC Red blood cell (chronic transfusions $\geq 4$ per year) |                             |        |                                                               |        |

*Figure*

Total body less head areal bone mineral density Z-scores (aBMD Z-scores) versus chronological age (years) for females (panel A) and males (Panel B), compared with height-adjusted total body less head aBMD Z-scores (Ht-aBMD Z-scores) versus chronological age (years) for females (panel C) and males (Panel D) in the Sickle Cell Clinical Research Program (SCCRIP) pediatric cohort. Low bone density is defined as aBMD Z-scores or Ht-aBMD Z-scores  $\leq -2$  (blue horizontal line)

**A****aBMD Z-scores: Female**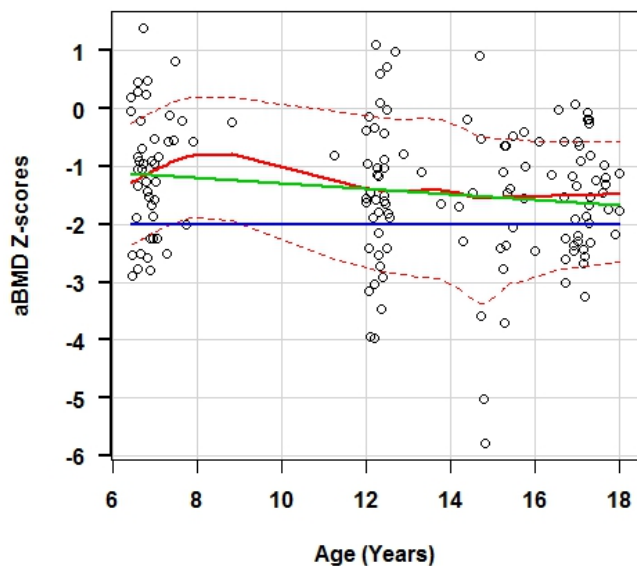**B****aBMD Z-scores: Male**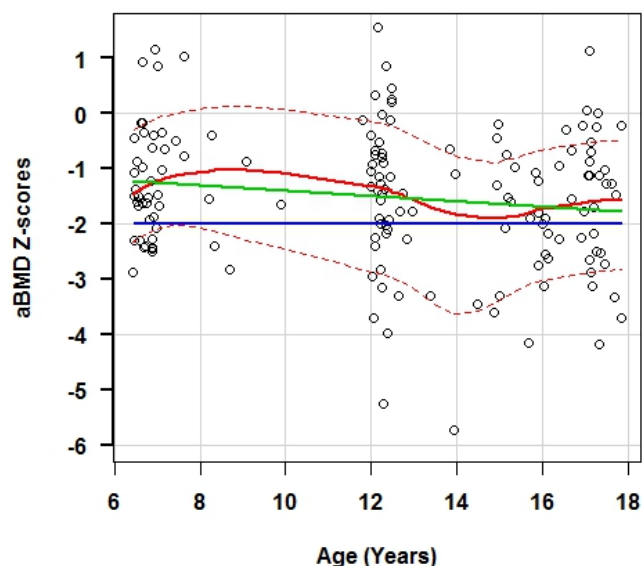**C****Ht-aBMD Z-scores: Female**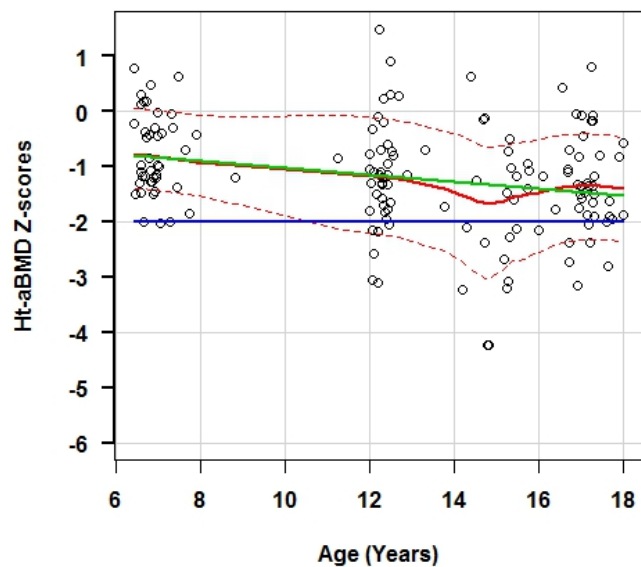**D****Ht-aBMD Z-scores: Male**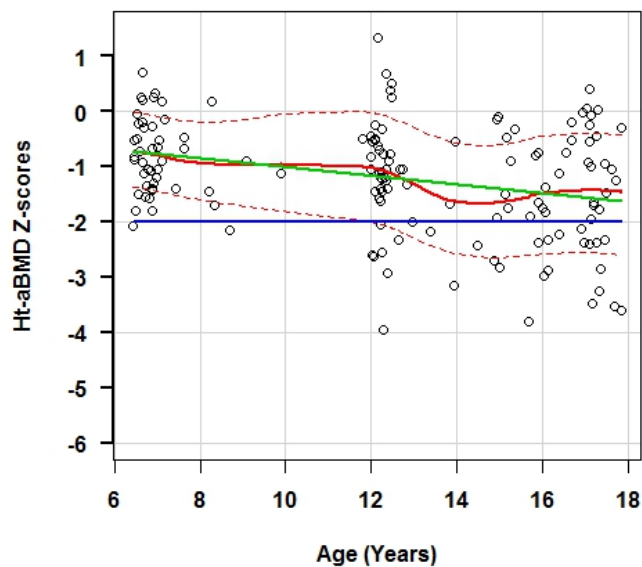



| <b>SCCRIP Investigators (as of Amendment 7.0)</b>                       |                               |                                                                            |
|-------------------------------------------------------------------------|-------------------------------|----------------------------------------------------------------------------|
| <b>Name</b>                                                             | <b>Institution/Department</b> | <b>Email Address</b>                                                       |
| <b>St. Jude Children's Research Hospital</b>                            |                               |                                                                            |
| Jane Hankins, MD, MS (Principal Investigator)                           | Hematology                    | <a href="mailto:Jane.Hankins@STJUDE.ORG">Jane.Hankins@STJUDE.ORG</a>       |
| Jeremie Estepp, MD (Co-Principal Investigator)                          | Hematology                    | <a href="mailto:Jeremie.Estepp@STJUDE.ORG">Jeremie.Estepp@STJUDE.ORG</a>   |
| Barry Shulkin, MD                                                       | Diagnostic Imaging            | Barry.Shulkin@STJUDE.ORG                                                   |
| Claudia Hillenbrand, PhD                                                | Diagnostic Imaging            | Claudia.Hillenbrand@STJUDE.ORG                                             |
| Daniel Garrison, PhD* (*Dr. Garrison is no longer with the institution) | Psychology                    | <a href="mailto:Daniel.Garrison@STJUDE.ORG">Daniel.Garrison@STJUDE.ORG</a> |
| Doralina Anghelescu, MD                                                 | Anesthesiology                | Doralina.Anghelescu@STJUDE.ORG                                             |
| Ellis Neufeld, MD, PhD                                                  | Administration                | <a href="mailto:Ellis.Neufeld@STJUDE.ORG">Ellis.Neufeld@STJUDE.ORG</a>     |
| Grace Champlin (Kirkpatrick)                                            | Hematology                    | gkirkpat@uthsc.edu                                                         |
| Guolian Kang, PhD                                                       | Biostatistics                 | <a href="mailto:Guolian.Kang@STJUDE.ORG">Guolian.Kang@STJUDE.ORG</a>       |
| Jason Hodges, PhD                                                       | Hematology                    | Jason.Hodges@STJUDE.ORG                                                    |
| Jerlym Porter, PhD                                                      | Psychology                    | Jerlym.Porter@STJUDE.ORG                                                   |
| Julia Hurwitz, PhD                                                      | Infectious Disease            | Julia.Hurwitz@STJUDE.ORG                                                   |
| Kevin Krull, PhD                                                        | Epidemiology & Cancer Control | Kevin.Krull@STJUDE.ORG                                                     |
| Latika Puri, MD                                                         | Hematology                    | Latika.Puri@STJUDE.ORG                                                     |
| Leslie Robison, PhD                                                     | Epidemiology & Cancer Control | <a href="mailto:Les.Robison@STJUDE.ORG">Les.Robison@STJUDE.ORG</a>         |
| Lisa Jacola, PhD                                                        | Psychology                    | Lisa.Jacola@STJUDE.ORG                                                     |
| Marita Partanen, PhD                                                    | Psychology                    | Marita.Partanen@STJUDE.ORG                                                 |
| Mary Elizabeth McCarville, MD                                           | Diagnostic Imaging            | Beth.McCarville@STJUDE.ORG                                                 |
| Mitchell Weiss, MD, PhD                                                 | Hematology                    | <a href="mailto:Mitch.Weiss@STJUDE.ORG">Mitch.Weiss@STJUDE.ORG</a>         |
| Nickhill Bhakta, MD                                                     | Global Pediatric Medicine     | Nickhill.Bhakta@STJUDE.ORG                                                 |
| Nicole Alberts, PhD                                                     | Psychology                    | <a href="mailto:Nicole.Alberts@STJUDE.ORG">Nicole.Alberts@STJUDE.ORG</a>   |
| Nidal Boulos, PhD                                                       | Hematology                    | <a href="mailto:Nidal.Boulos@STJUDE.ORG">Nidal.Boulos@STJUDE.ORG</a>       |
| Ralf Loeffler, PhD                                                      | Diagnostic Imaging            | Ralf.Loeffler@STJUDE.ORG                                                   |
| Scott Hwang, MD, PhD                                                    | Diagnostic Imaging            | Scott.Hwang@STJUDE.ORG                                                     |

|                                           |                                                                                   |                                                                                  |
|-------------------------------------------|-----------------------------------------------------------------------------------|----------------------------------------------------------------------------------|
| Sue Kaste, DO                             | Diagnostic Imaging                                                                | Sue.Kaste@STJUDE.ORG                                                             |
| Wassim Chemaitilly, MD                    | Endocrinology                                                                     | Wassim.Chemaitilly@STJUDE.ORG                                                    |
| Winfred Wang, MD (Emeritus)               | Hematology                                                                        | <a href="mailto:Winfred.Wang@STJUDE.ORG">Winfred.Wang@STJUDE.ORG</a>             |
| Yan Zheng, MD, PhD                        | Pathology                                                                         | Yan.Zheng@STJUDE.ORG                                                             |
| Yutaka Yasui, PhD                         | Epidemiology & Cancer Control                                                     | <a href="mailto:yutaka.yasui@stjude.org">yutaka.yasui@stjude.org</a>             |
| Evadnie Rampersaud, PhD                   | Computational Biology                                                             | <a href="mailto:evadnie.rampersaud@stjude.org">evadnie.rampersaud@stjude.org</a> |
| Gang Wu, PhD                              | Computational Biology                                                             | <a href="mailto:gang.wu@stjude.org">gang.wu@stjude.org</a>                       |
| Sean Phipps, PhD                          | Psychology                                                                        | <a href="mailto:sean.phipps@stjude.org">sean.phipps@stjude.org</a>               |
| Clifford Takemoto, MD                     | Hematology                                                                        | <a href="mailto:Clifford.Takemoto@STJUDE.ORG">Clifford.Takemoto@STJUDE.ORG</a>   |
| Nidhi Bhatt, MD                           | Hematology                                                                        | <a href="mailto:Nidhi.Bhatt@STJUDE.ORG">Nidhi.Bhatt@STJUDE.ORG</a>               |
| Parul Rai, MD                             | Hematology                                                                        | <a href="mailto:Parul.Rai@STJUDE.ORG">Parul.Rai@STJUDE.ORG</a>                   |
| Akshay Sharma, MBBS                       | Bone Marrow Transplantation & Cellular Therapy                                    | <a href="mailto:akshay.sharma@stjude.org">akshay.sharma@stjude.org</a>           |
| Jason Rosch, PhD                          | Infectious Disease                                                                | Jason.Rosch@STJUDE.ORG                                                           |
| Ulrike Reiss, MD                          | Hematology                                                                        | <a href="mailto:ulrike.reiss@stjude.org">ulrike.reiss@stjude.org</a>             |
| <b>External Investigators</b>             |                                                                                   |                                                                                  |
| Allison King, MD, MPH, PhD                | Washington University School of Medicine St. Louis<br>Children's Hospital         | <a href="mailto:king_a@wustl.edu">king_a@wustl.edu</a>                           |
| Amanda Brandow, DO                        | The Medical College of Wisconsin Children's<br>Hospital of Wisconsin              | <a href="mailto:abrandow@mcw.edu">abrandow@mcw.edu</a>                           |
| Artangela D. Henry, DNP, AGACNP-BC, FNP-C | Methodist Adult Comprehensive Sickle Cell Center                                  | <a href="mailto:Artangela.Henry@mlh.org">Artangela.Henry@mlh.org</a>             |
| Babette Zemel, PhD                        | Children's Hospital of Philadelphia<br>Clinical and Translational Research Center | ZEMEL@email.chop.edu                                                             |
| Christina Abrams, MD                      | University of Tennessee Health Science Center                                     | <a href="mailto:ctreadw3@uthsc.edu">ctreadw3@uthsc.edu</a>                       |
| Curtis Owens, MD                          | Methodist Adult Comprehensive Sickle Cell Center                                  | <a href="mailto:curtis.owens@mlh.org">curtis.owens@mlh.org</a>                   |
| James Gurney, PhD                         | University of Memphis School of Public Health                                     | <a href="mailto:jggurney@memphis.edu">jggurney@memphis.edu</a>                   |
| Jeffrey D. Lebensburger, MD               | University of Alabama at Birmingham School of<br>Medicine                         | jlebensburger@ped.s.uab.edu                                                      |

|                           |                                                                     |                                                                          |
|---------------------------|---------------------------------------------------------------------|--------------------------------------------------------------------------|
| Jeffrey Deyo, MD, PhD     | Our Lady of the Lake Regional Medical Center                        | jeff.deyo@lolrhc.com                                                     |
| Justin Newman, MD         | Methodist Healthcare                                                | jrobnewman@me.com                                                        |
| Kay Saving, MD            | Children's Hospital of Illinois at OSF-Saint Francis Medical Center | <a href="mailto:kls@uicomp.uic.edu">kls@uicomp.uic.edu</a>               |
| Matthew Smeltzer, MS      | University of Memphis School of Public Health                       | msmiltzer@memphis.edu                                                    |
| Neeraja Yedlapati, MD     | University of Tennessee Health Science Center                       | Neeraja.Yedlapati@mlh.org                                                |
| Oyebimpe Adesina, MD      | University of Washington Medicine Seattle Cancer Care Alliance      | <a href="mailto:oadesina@seattlecca.org">oadesina@seattlecca.org</a>     |
| Patricia Adams-Graves, MD | Regional One Health Diggs-Kraus Sickle Cell Center                  | padamsgraves@uthsc.edu                                                   |
| Patricia Dubin, MD        | University of Tennessee Health Science Center                       | <a href="mailto:pdubin@uthsc.edu">pdubin@uthsc.edu</a>                   |
| Paulette Bryant, MD       | Novant Health Hemby Children's Hospital                             | <a href="mailto:pcbryant@novanthealth.org">pcbryant@novanthealth.org</a> |
| Rima Zahr, DO             | Le Bonheur Children's Hospital                                      | Rima.Zahr@STJUDE.ORG                                                     |
| Robert L. Davis, MD, MPH  | University of Tennessee-ORNL Center in Biomedical Informatics       | <a href="mailto:rdavis88@uthsc.edu">rdavis88@uthsc.edu</a>               |
| Stella Chou, MD           | Children's Hospital of Philadelphia<br>Division of Hematology       | CHOUS@email.chop.edu                                                     |
| Ken Ataga, MD             | University of Tennessee Health Science Center                       | <a href="mailto:kataga@uthsc.edu">kataga@uthsc.edu</a>                   |
